# Supplementary material for: Ultra-low detection limit chemoresistive NO2 gas sensor using single transferred MoS2 flake: an advanced nanofabrication
Source: Royal Society of Chemistry journal article supplement (doi:10.1039/d2ra06228c), 2022-01-01
Supplement: d2ra06228c1.pdf [file d2ra06228c1.pdf]

# Supplementary Information

## Ultra-low detection limit chemoresistive NO<sub>2</sub> gas sensor using single transferred MoS<sub>2</sub> flake: an advanced nanofabrication

Hoang Si Hong <sup>a\*</sup>, Tran Vinh Hoang <sup>b</sup>, Nguyen Thanh Huong <sup>a</sup>, Nguyen Hoang Nam <sup>a</sup>, Dao Duc Thinh <sup>a</sup>, Nguyen Thi Hue <sup>a</sup> and Nguyen Duc Thuan <sup>a</sup>

<sup>a</sup> School of Electrical and Electronic Engineering, Hanoi University of Science and Technology (HUST), No. 1 Dai Co Viet Road, Hanoi, Vietnam

<sup>b</sup> School of Chemical Engineering, Hanoi University of Science and Technology (HUST), No. 1 Dai Co Viet Road, Hanoi, Vietnam

\* Corresponding author. Tel.: +84-43-869-6211

E-mail address: [hong.hoangsy@hust.edu.vn](mailto:hong.hoangsy@hust.edu.vn) (Hoang Si Hong);

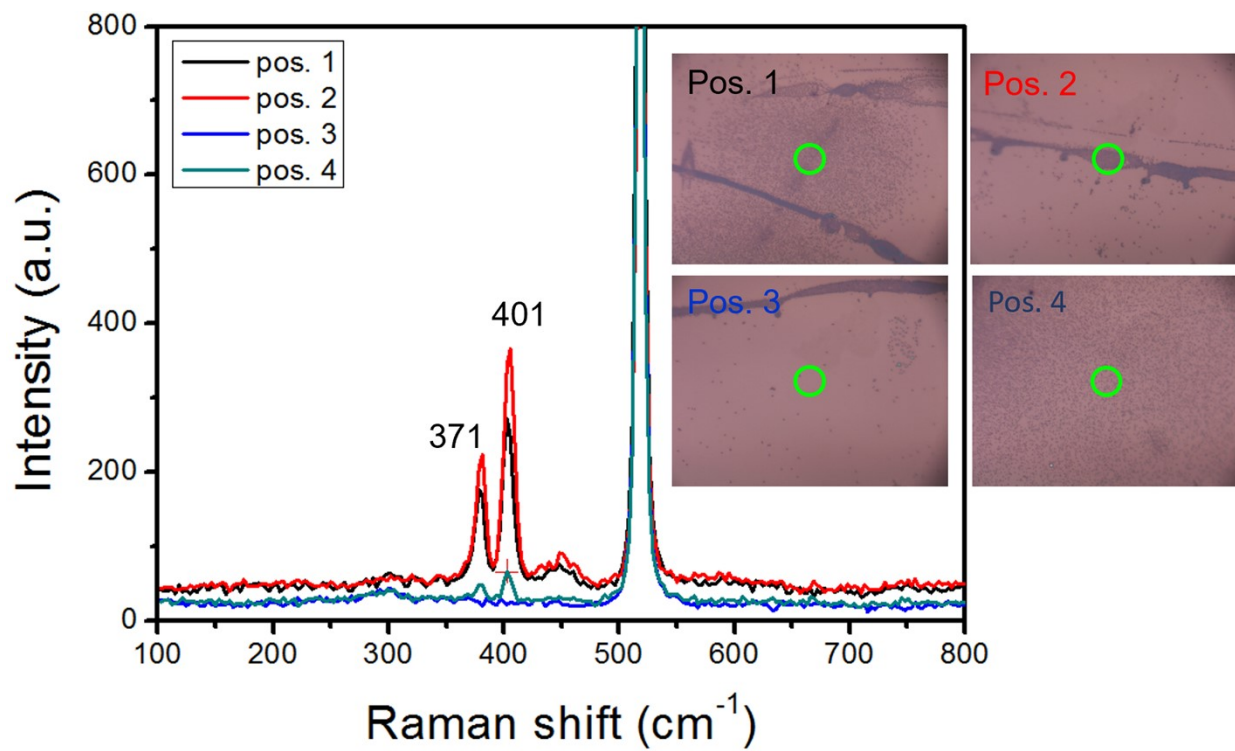

27

28 **Figure S1.** Raman spectra of transferred MoS<sub>2</sub> on SiO<sub>2</sub>/Si substrate

29

30

31

32

33

34

35

36

37

38

39

40

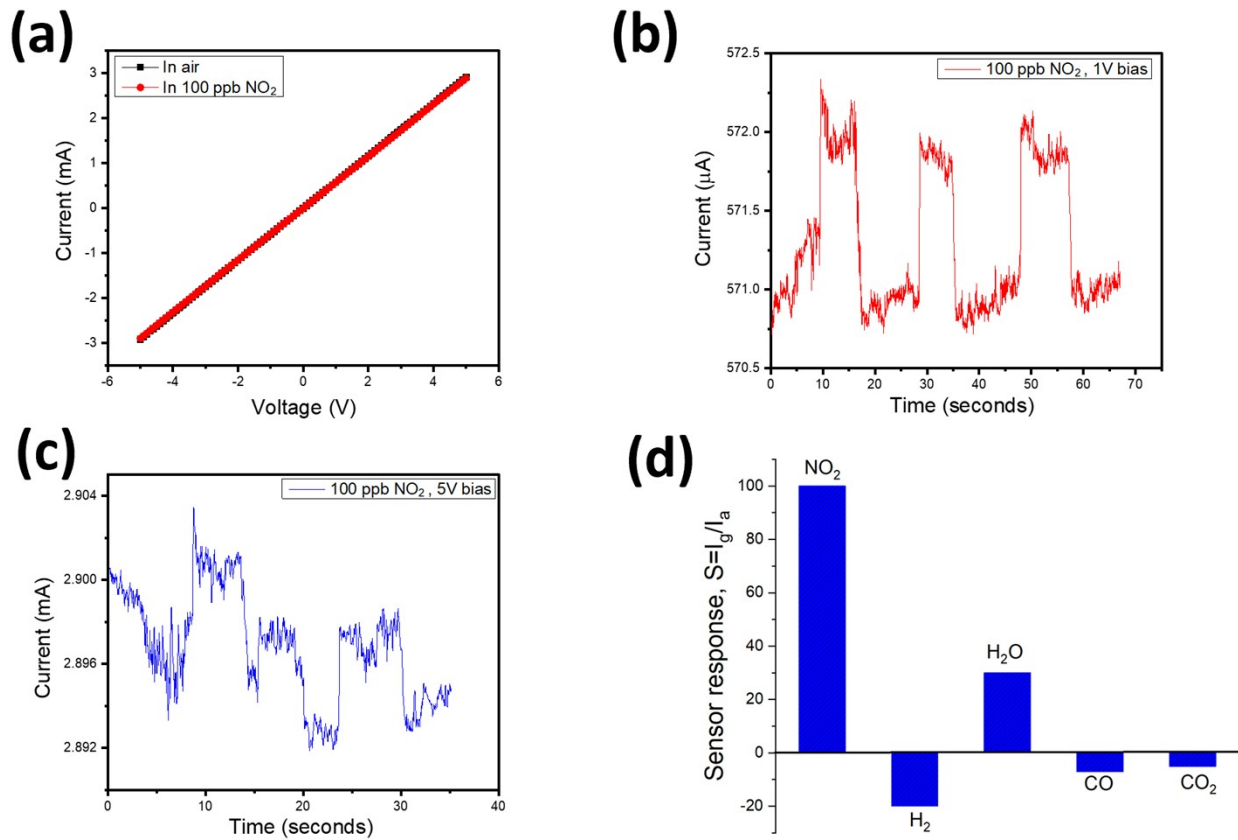

41

42 **Figure S2.** (a,b,c) The response of sensor with similar structure fabricated on pure graphene  
 43 (without MoS<sub>2</sub>) for comparison purpose, (d) the selectivity of fabricated sensor of Au-MoS<sub>2</sub>-Au  
 44 (measured at 1000 ppb).

45
